# Supplementary material
Source: publisher site journal article supplement (https://www.spandidos-publications.com/6732/downloadSupplementary)
Supplement: Supplementary file 1 [file downloadSupplementary]

## Sheet: Table SII
Table SII. Analysis of the association between microsatellite instability and clinicopathological features in 68 follow-up cases of colorectal cancer.
Variable	Total (n=68)	MSS (n=43)	MSI-H (n=25)	P-value	Statistic
Sex				0.304	1.056
Female	22 (32.4)	12 (27.9)	10 (40.0)
Male	46 (67.6)	31 (72.1)	15 (60.0)
Age				0.349	0.877
≤60 years	47 (69.1)	28 (65.1)	19 (76.0)
>60 years	21 (30.9)	15 (34.9)	6 (24.0)
TNM stage				<0.001	14.741
I-II	31 (45.6)	12 (27.9)	19 (76.0)
III-IV	37 (54.4)	31 (72.1)	6 (24.0)
Site				<0.001	14.138
Right colon	20 (29.4)	7 (16.3)	13 (52.0)
Left colon	26 (38.2)	16 (37.2)	10 (40.0)
Rectum	22 (32.4)	20 (46.5)	2 (8.0)
Status				0.033	4.545
Survival	53 (77.9)	30 (69.8)	23 (92.0)
Death	15 (22.1)	13 (30.2)	2 (8.0)
Time, months	27.9±11.5	25.7±9.4	31.6±13.8	0.039	4.416
Data are presented as n (%) or mean ± standard deviation. TNM, tumor-node-metastasis; MSI-H, high-frequency microsatellite instability; MSS, microsatellite stability.
